# Supplementary material
Source: publisher figshare collection journal article supplement (https://frontiersin.figshare.com/ndownloader/files/13514381)
Supplement: Supplementary file 1 [file 13514381]

Table S2. Latin American and Caribbean network official counterparts.

| Country | Focal point name | Institution |
| --- | --- | --- |
| Brazil | Roberto Meigikos dos Anjos | Universidad Federal Fluminense |
| Chile | Benjamín Suárez Isla | Universidad de Chile |
| Colombia | Jesús Antonio Garay Tinoco | Instituto de Investigaciones Marinas y Costeras |
| Costa Rica | Alvaro Morales Ramírez | Universidad de Costa Rica |
| Cuba | Carlos Alonso Hernández | Centro de Estudios Ambientales de Cienfuegos |
| Dominican Republic | Cynthia Alvarez Pichardo | Ministerio de Energía y Minas |
| El Salvador | Oscar Armando Amaya Monterrosa | Universidad de El Salvador |
| Guatemala | Hector Leonel Carrillo Ovalle | Universidad de San Carlos de Guatemala |
| Haiti | Exil Lucienna | Ministère de l'Environnement |
| Mexico | Ana Carolina Ruíz Fernández | Universidad Nacional Autónoma de México |
| Nicaragua | Katia Lily Montenegro Rayo | Universidad Nacional Autónoma de Nicaragua |
| Panama | Alexis Omar Peña | Autoridad de Recursos Acuáticos de Panamá |
| Uruguay | Silvia M. Méndez | Dirección Nacional de Recursos Acuáticos |
| Venezuela | Fabiola Marthina López Monroy | Universidad de Oriente |
